# Supplementary material for: Modelling water diffusion in plasticizers: development and optimization of a force field for 2,4-dinitroethylbenzene and 2,4,6-trinitroethylbenzene
Source: Royal Society of Chemistry journal article supplement (doi:10.1039/c7ra12254c), 2018-01-01
Supplement: c7ra12254c1.pdf [file c7ra12254c1.pdf]

## Supplementary Material

### Force-field Bonding Parameters

**Table 1** - Bond angles, lengths and their associated force constants for 2,4-DNEB

| angle label | angle (°) | angle force constant kcal mol <sup>-1</sup> | bond label | bond length (Å) | bond force constant kcal mol <sup>-1</sup> |
|-------------|-----------|---------------------------------------------|------------|-----------------|--------------------------------------------|
| C1-C2-C3    | 118.3     | 45.845                                      | C1-C2      | 1.381           | 396.060                                    |
| C1-C2-H1    | 120.9     | 17.794                                      | C1-C6      | 1.389           | 309.486                                    |
| C1-C6-C5    | 118.7     | 47.814                                      | C1-N2      | 1.475           | 147.446                                    |
| C1-C6-H2    | 119.7     | 17.048                                      | C2-C3      | 1.388           | 315.792                                    |
| C1-N2-O1    | 117.3     | 46.273                                      | C2-H1      | 1.077           | 350.855                                    |
| C1-N2-O2    | 117.6     | 44.336                                      | C3-C4      | 1.402           | 321.522                                    |
| C2-C1-C6    | 121.4     | 43.961                                      | C3-N1      | 1.479           | 110.392                                    |
| C2-C1-N2    | 119.0     | 37.416                                      | C4-C5      | 1.402           | 358.459                                    |
| C2-C3-C4    | 122.9     | 47.000                                      | C4-C7      | 1.510           | 193.014                                    |
| C2-C3-N1    | 115.4     | 48.531                                      | C5-C6      | 1.384           | 338.068                                    |
| C3-C2-H1    | 120.8     | 17.266                                      | C5-H6      | 1.081           | 339.334                                    |
| C3-C4-C5    | 116.0     | 39.872                                      | C6-H2      | 1.079           | 349.463                                    |
| C3-C4-C7    | 125.8     | 37.907                                      | C7-C8      | 1.538           | 113.742                                    |
| C3-N1-O3    | 117.8     | 54.335                                      | C7-H3      | 1.089           | 307.316                                    |
| C3-N1-O4    | 117.2     | 37.037                                      | C8-H4      | 1.089           | 320.433                                    |
| C4-C3-N1    | 121.6     | 45.817                                      | C8-H5      | 1.090           | 103.472                                    |
| C4-C5-C6    | 122.6     | 54.708                                      | N1-O3      | 1.225           | 505.821                                    |
| C4-C5-H6    | 118.3     | 17.569                                      | N1-O4      | 1.223           | 524.178                                    |
| C4-C7-C8    | 112.9     | 37.238                                      | N2-O1      | 1.225           | 518.364                                    |
| C4-C7-H3    | 109.1     | 37.504                                      | N2-O2      | 1.223           | 522.263                                    |
| C5-C4-C7    | 118.2     | 35.121                                      |            |                 |                                            |
| C5-C6-H2    | 121.6     | 20.554                                      |            |                 |                                            |
| C6-C1-N2    | 119.5     | 46.621                                      |            |                 |                                            |
| C6-C5-H6    | 119.1     | 17.672                                      |            |                 |                                            |
| C7-C8-H4    | 111.0     | 23.433                                      |            |                 |                                            |
| C7-C8-H5    | 109.9     | 19.696                                      |            |                 |                                            |
| C8-C7-H3    | 109.2     | 22.692                                      |            |                 |                                            |
| H3-C7-H3    | 107.3     | 37.665                                      |            |                 |                                            |
| H4-C8-H5    | 108.1     | 20.954                                      |            |                 |                                            |
| H4-C8-H4    | 108.5     | 24.058                                      |            |                 |                                            |
| O1-N2-O2    | 125.0     | 39.169                                      |            |                 |                                            |
| O3-N1-O4    | 125.0     | 49.379                                      |            |                 |                                            |

## Force-field Bonding Parameters

**Table 2** - Bond angles, lengths and their associated force constants for 2,4,6-TNEB

| angle label | angle (°) | angle force constant kcal mol <sup>-1</sup> | bond label | bond length (Å) | bond force constant kcal mol <sup>-1</sup> |
|-------------|-----------|---------------------------------------------|------------|-----------------|--------------------------------------------|
| C1-C2-C1    | 121.2     | 53.330                                      | C1-C2      | 1.381           | 305.549                                    |
| C1-C2-N1    | 119.4     | 43.139                                      | C1-C3      | 1.385           | 343.552                                    |
| C1-C3-C4    | 124.2     | 49.689                                      | C1-H1      | 1.078           | 352.237                                    |
| C1-C3-N2    | 114.6     | 50.765                                      | C2-N1      | 1.477           | 128.720                                    |
| C2-C1-C3    | 118.3     | 47.652                                      | C3-C4      | 1.407           | 289.481                                    |
| C2-C1-H1    | 120.8     | 16.581                                      | C3-N2      | 1.484           | 151.191                                    |
| C2-N1-O3    | 117.2     | 36.035                                      | C4-C5      | 1.513           | 189.968                                    |
| C3-C1-H1    | 120.9     | 67.881                                      | C5-C6      | 1.541           | 128.785                                    |
| C3-C4-C3    | 113.7     | 36.888                                      | C5-H2      | 1.089           | 120.522                                    |
| C3-C4-C5    | 123.1     | 41.074                                      | C6-H3      | 1.086           | 134.596                                    |
| C3-N2-O1    | 118.1     | 61.941                                      | C6-H4      | 1.089           | 317.571                                    |
| C3-N2-O2    | 116.4     | 57.002                                      | N1-O3      | 1.222           | 526.127                                    |
| C4-C3-N2    | 121.2     | 45.755                                      | N2-O1      | 1.221           | 410.589                                    |
| C4-C5-C6    | 114.2     | 37.247                                      | N2-O2      | 1.222           | 325.988                                    |
| C4-C5-H2    | 108.7     | 36.312                                      |            |                 |                                            |
| C5-C6-H3    | 111.0     | 45.107                                      |            |                 |                                            |
| C5-C6-H4    | 108.9     | 27.020                                      |            |                 |                                            |
| C6-C5-H2    | 109.0     | 44.783                                      |            |                 |                                            |
| H2-C5-H2    | 107.0     | 56.359                                      |            |                 |                                            |
| H3-C6-H4    | 108.2     | 24.611                                      |            |                 |                                            |
| H3-C6-H3    | 109.5     | 51.985                                      |            |                 |                                            |
| O1-N2-O2    | 125.5     | 69.733                                      |            |                 |                                            |
| O3-N1-O3    | 125.6     | 36.558                                      |            |                 |                                            |

## Force-field Non-Bonding Parameters

**Table 3** Dihedral angles for 2,4-DNEB and 2,4,6-TNEB

| Dihedral Angle                                                     | Number of paths <sup>c</sup> | $V_n/2^d$ | $\gamma^e$ | $n^f$ |
|--------------------------------------------------------------------|------------------------------|-----------|------------|-------|
| C <sub>ar</sub> -C <sub>ar</sub> -C <sub>ar</sub> -C <sub>ar</sub> | 1                            | 14.5      | 180.0      | 2.0   |
| C <sub>ar</sub> -C <sub>ar</sub> -C <sub>ar</sub> -C <sub>al</sub> | 1                            | 1.10      | 180.0      | 2.0   |
| C <sub>ar</sub> -C <sub>ar</sub> -C <sub>ar</sub> -N               | 1                            | 6.14      | 180.0      | 2.0   |
| C <sub>ar</sub> -C <sub>ar</sub> -C <sub>ar</sub> -H               | 1                            | 1.10      | 180.0      | 2.0   |
| C <sub>ar</sub> -C <sub>ar</sub> -N-O                              | 4                            | 3.68      | 180.0      | 2.0   |
| C <sub>ar</sub> -C <sub>ar</sub> -C <sub>al</sub> -C <sub>al</sub> | 1                            | 0.00      | 0.000      | 2.0   |
| H-C <sub>al</sub> -C <sub>al</sub> -H                              | 1                            | 0.15      | 0.000      | 3.0   |
| C <sub>ar</sub> -O-N-O<br>(improper)                               | -                            | 7.28      | 180.0      | 2.0   |

a - ar = aromatic carbon atoms, b - al = aliphatic carbon atoms, c - number of bond paths that total  $V_n$  must be divided by, d - magnitude of the torsion in kcal mol<sup>-1</sup>, e - phase angle in degrees, f - periodicity of the torsion

**Table 4** Lennard-Jones parameters for 2,4-DNEB and 2,4,6-TNEB

|                 | $R_{\min}^a$ | $\epsilon^b$ |
|-----------------|--------------|--------------|
| C <sub>ar</sub> | 1.9920       | 0.0700       |
| C <sub>al</sub> | 1.9080       | 0.1094       |
| H <sub>ar</sub> | 1.3580       | 0.0300       |
| H <sub>al</sub> | 1.4870       | 0.0157       |
| N               | 1.8240       | 0.1200       |
| O               | 1.6610       | 0.1700       |

a - the distance where the potential reaches a minimum in Angstroms ( $\sigma \times 2^{1/6}$ ), b - the potential well depth in kcal mol<sup>-1</sup>

## Simulation Boxes for simulations at 298 K

### Method for 2,4,6-TNEB

Based on monoclinic TNT unit cell reported at 100 K<sup>44</sup>

The lattice parameters,  $a = 14.9113 \text{ \AA}$ ,  $b = 6.0340 \text{ \AA}$ ,  $c = 20.8815 \text{ \AA}$

The volume of the unit cell was used to calculate how many TNT molecules would fit in a  $40 \text{ \AA} \times 40 \text{ \AA} \times 40 \text{ \AA}$  cubic box.

$14.9113 \text{ \AA} \times 6.0340 \text{ \AA} \times 20.8815 \text{ \AA} = 1879 \text{ \AA}^3$ , the unit cell of this volume contains 8 TNT molecules

$40 \text{ \AA} \times 40 \text{ \AA} \times 40 \text{ \AA} = 64000 \text{ \AA}^3$ , a simulation box of this size can hold 272 TNT molecules

TNT = 21 atoms                      2,4,6-TNEB = 24 atoms

Number of atoms in  $40 \text{ \AA} \times 40 \text{ \AA} \times 40 \text{ \AA}$  cubic box of TNT molecules is  $272 \times 21 = 5712$  atoms

Estimate of the number of 2,4,6-TNEB molecules in  $40 \text{ \AA} \times 40 \text{ \AA} \times 40 \text{ \AA}$  cubic box  
 $5712 \div 24 = \mathbf{238 \text{ molecules}}$

### Method for 2,4-DNEB

Based on monoclinic 2,4-DNT unit cell reported at 173 K<sup>45</sup>

The lattice parameters,  $a = 8.0057 \text{ \AA}$ ,  $b = 15.1273 \text{ \AA}$ ,  $c = 12.8853 \text{ \AA}$

The volume of the unit cell was used to calculate how many 2,4-DNT cells would fit in a  $40 \text{ \AA} \times 40 \text{ \AA} \times 40 \text{ \AA}$  cubic box.

$8.0057 \text{ \AA} \times 15.1273 \text{ \AA} \times 12.8853 \text{ \AA} = 1561 \text{ \AA}^3$ , the unit cell of this volume contains 8 2,4-DNT molecules

$40 \text{ \AA} \times 40 \text{ \AA} \times 40 \text{ \AA} = 64000 \text{ \AA}^3$ , a simulation box of this size can hold 328 2,4-DNT molecules

2,4-DNT = 19 atoms                      2,4-DNEB = 22 atoms

Number of atoms in  $40 \text{ \AA} \times 40 \text{ \AA} \times 40 \text{ \AA}$  cubic box of 2,4-DNT molecules is  $328 \times 19 = 6231.9$  atoms

Estimate of number of 2,4-DNEB molecules in  $40 \text{ \AA} \times 40 \text{ \AA} \times 40 \text{ \AA}$  cubic box  
 $6231.9 \div 22 = \mathbf{283 \text{ molecules}}$

### Calculation of diffusion coefficients

$$6D = \lim_{t \rightarrow \infty} \frac{MSD}{t}$$

To calculate the diffusion coefficients, D the gradient was divided by 6, according to the equation below where  $n$  the number of dimensions is 3,

To calculate the standard error of D the standard error of the gradient was divided by 6.

**Table 5** - Table displaying the data used to calculate the self-diffusion coefficients of 2,4-DNEB and 2,4,6-TNEB and the diffusion coefficients of 2,4-DNEB and 2,4,6-TNEB in K10 and R8002 in  $\text{m}^2 \text{s}^{-1}$ .

|                                             | slope<br>( $\text{\AA}^2/\text{ps}$ ) | std. error of<br>slope<br>( $\text{\AA}^2/\text{ps}$ ) | D<br>( $\text{\AA}^2/\text{ps}$ ) | D<br>( $\text{m}^2/\text{s}$ ) | D std. error<br>( $\text{\AA}^2/\text{ps}$ ) | D std. error<br>( $\text{m}^2/\text{s}$ ) |
|---------------------------------------------|---------------------------------------|--------------------------------------------------------|-----------------------------------|--------------------------------|----------------------------------------------|-------------------------------------------|
| 2,4-DNEB<br>self-diffusion<br>coefficient   | 0.04961                               | 0.0003246                                              | 0.008268333                       | $8.26833 \cdot 10^{-11}$       | 0.0000541                                    | $5.41 \cdot 10^{-13}$                     |
| 2,4,6-TNEB<br>self-diffusion<br>coefficient | 0.003492                              | 0.00003313                                             | 0.000582                          | $5.82 \cdot 10^{-12}$          | $5.52167 \cdot 10^{-06}$                     | $5.52167 \cdot 10^{-14}$                  |
| 2,4,6-TNEB<br>in K10                        | 0.006111                              | 0.00006787                                             | 0.0010185                         | $1.0185 \cdot 10^{-11}$        | $1.1311710^{-05}$                            | $1.13117 \cdot 10^{-13}$                  |
| 2,4-DNEB in<br>K10                          | 0.008513                              | 0.00003632                                             | 0.001418833                       | $1.41883 \cdot 10^{-11}$       | $6.05333 \cdot 10^{-06}$                     | $6.05333 \cdot 10^{-14}$                  |
| 2,4,6-TNEB<br>in R8002                      | 0.002719                              | 0.00003724                                             | 0.000453167                       | $4.53167 \cdot 10^{-12}$       | $6.20667 \cdot 10^{-06}$                     | $6.20667 \cdot 10^{-14}$                  |
| 2,4-DNEB in<br>R8002                        | 0.004767                              | 0.0000737                                              | 0.0007945                         | $7.945 \cdot 10^{-12}$         | $1.22833 \cdot 10^{-05}$                     | $1.22833 \cdot 10^{-13}$                  |

**Table 6** - Table displaying the data used to calculate the diffusion coefficients, D in  $\text{m}^2 \text{s}^{-1}$  for SPC/E water in 2,4-DNEB, 2,4,6-TNEB, K10 and R8002 respectively.

|             | slope<br>( $\text{\AA}^2/\text{ps}$ ) | std. error of slope<br>( $\text{\AA}^2/\text{ps}$ ) | D<br>( $\text{\AA}^2/\text{ps}$ ) | D<br>( $\text{m}^2/\text{s}$ ) | D std. error<br>( $\text{\AA}^2/\text{ps}$ ) | D std. error<br>( $\text{m}^2/\text{s}$ ) |
|-------------|---------------------------------------|-----------------------------------------------------|-----------------------------------|--------------------------------|----------------------------------------------|-------------------------------------------|
| DNEB 298 K  | 0.2648                                | 0.001554                                            | 0.044133333                       | $4.41333 \cdot 10^{-10}$       | 0.000259                                     | $2.59 \cdot 10^{-12}$                     |
| DNEB 338 K  | 0.4956                                | 0.001313                                            | 0.0826                            | $8.26 \cdot 10^{-10}$          | 0.000218833                                  | $2.18833 \cdot 10^{-12}$                  |
| TNEB 298 K  | 0.05138                               | 0.000247                                            | 0.008563333                       | $8.56333 \cdot 10^{-11}$       | $4.11667 \cdot 10^{-5}$                      | $4.11667 \cdot 10^{-13}$                  |
| TNEB 338 K  | 0.06202                               | 0.0008206                                           | 0.010336667                       | $1.03367 \cdot 10^{-10}$       | 0.000136767                                  | $1.36767 \cdot 10^{-12}$                  |
| K10 298 K   | 0.1305                                | 0.0005878                                           | 0.02175                           | $2.175 \cdot 10^{-10}$         | $9.79667 \cdot 10^{-5}$                      | $9.79667 \cdot 10^{-13}$                  |
| K10 338 K   | 0.2221                                | 0.0007505                                           | 0.037016667                       | $3.70167 \cdot 10^{-10}$       | 0.000125083                                  | $1.25083 \cdot 10^{-12}$                  |
| R8002 298 K | 0.1231                                | 0.0006572                                           | 0.020516667                       | $2.05167 \cdot 10^{-10}$       | 0.000109533                                  | $1.09533 \cdot 10^{-12}$                  |
| R8002 338 K | 0.3312                                | 0.003311                                            | 0.0552                            | $5.52 \cdot 10^{-10}$          | 0.000551833                                  | $5.51833 \cdot 10^{-12}$                  |

MSD ( $\text{\AA}^2$ ) versus time (ps) graphs for the self-diffusion of 2,4,6-TNEB and 2,4-DNEB and for SPC/E water in 2,4,6-TNEB and 2,4-DNEB, respectively at 298 K

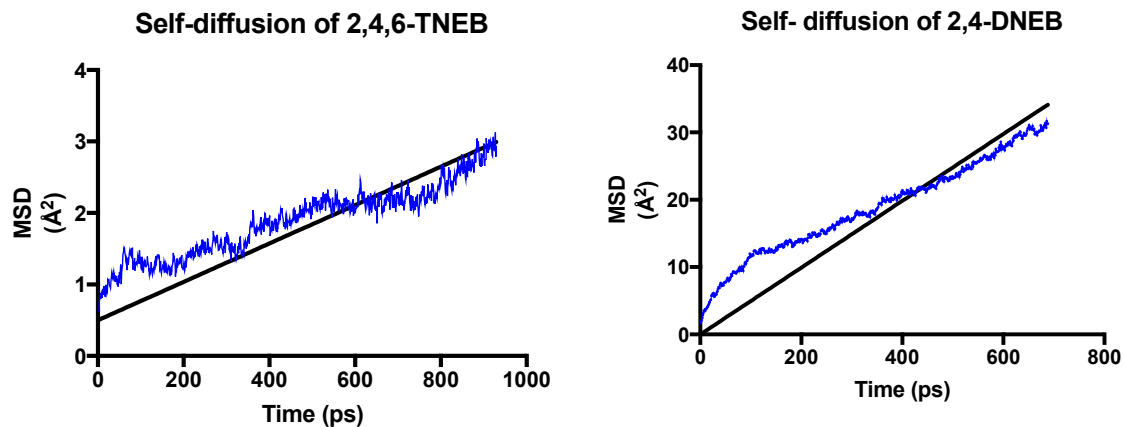

**Figure 1** Graphs displaying the MSD ( $\text{\AA}^2$ ) vs time (ps) at 298 K of 2,4,6-TNEB in 2,4,6-TNEB and 2,4-DNEB in 2,4-DNEB respectively.

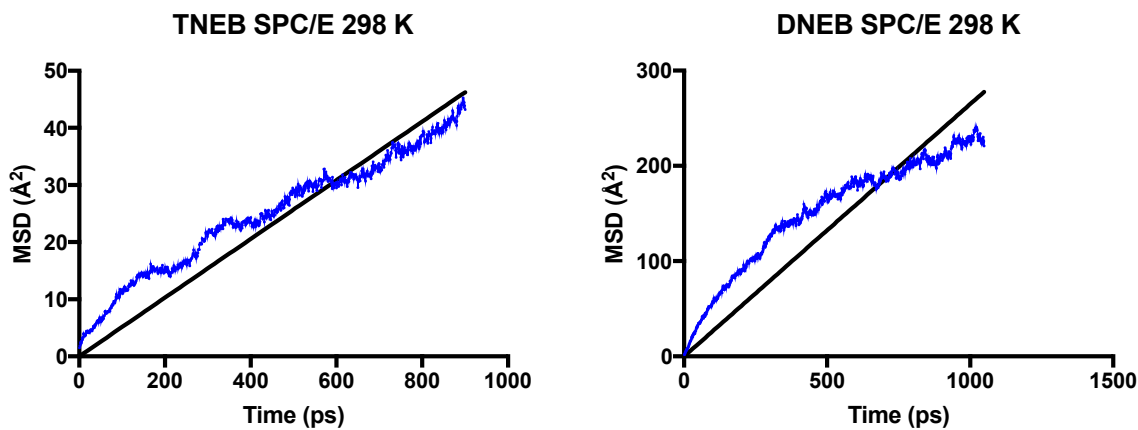

**Figure 2** Graphs displaying the MSD ( $\text{\AA}^2$ ) vs time (ps) at 298 K of SPC/E water in 2,4,6-TNEB and SPC/E water in 2,4-DNEB respectively.
